# Supplementary material for: The Down-Shifting Luminescence of Rare-Earth Nanoparticles for Multimodal Imaging and Photothermal Therapy of Breast Cancer
Source: MDPI journal article supplement (doi:10.3390/biology13030156), 2024-02-28
Supplement: s1 [file s1]

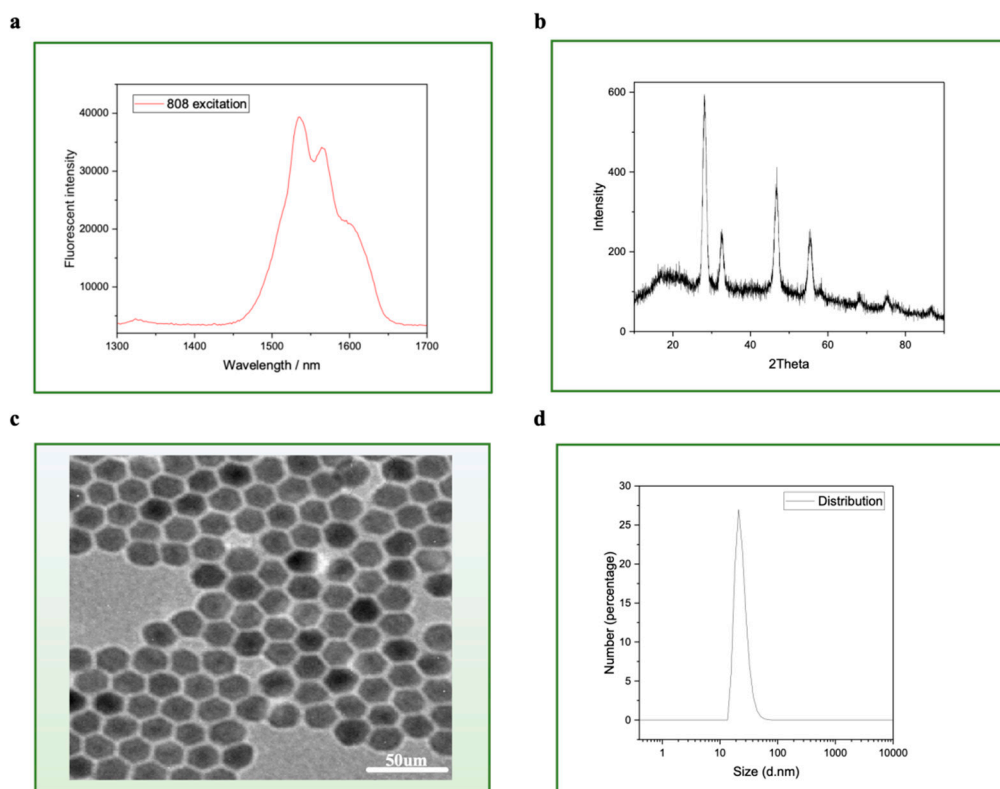

**Supplementary Figure S1.** Characterization of  $\alpha$ -Er NPs. a, The NIR-II fluorescence spectrum of  $\alpha$ -Er NPs. b, The size and position of the main diffraction peaks in the XRD pattern of  $\alpha$ -Er NPs. c, Transmission electron microscope (TEM) images of  $\alpha$ -Er NPs. d, Size distribution of  $\alpha$ -Er NPs determined by dynamic light scattering.
